# Supplementary material
Source: MDPI journal article supplement (https://www.mdpi.com/2311-5637/8/5/218)
Supplement: s1 [file s1]

Table S1: Primers used in this study.

| Primers | Sequences 5'-3'                | Amplification product                         |
|---------|--------------------------------|-----------------------------------------------|
| F1      | CCCAGNNKATGAACGATAATGTCTGGCT   | site-saturation mutagenesis of<br>ECA II-D60  |
| R1      | TTCATMNNCTGGGAGCCGATATTCACTAC  | site-saturation mutagenesis<br>ECA II-D60     |
| F2      | AATGAANNKCCGAAAGTCGGCATTGTTTA  | site-saturation mutagenesis of<br>ECA II-L211 |
| R2      | GGMNNTTCATTCAGCTTAGAGACAT      | site-saturation mutagenesis of<br>ECA II-L211 |
| F3      | GGCTNNKACGCAAACCAAAGATCCGCA    | site-saturation mutagenesis of<br>ECA II-L310 |
| R3      | TGCGTMNNAGCCAGTTGCAGCAGAACGCGC | site-saturation mutagenesis of<br>ECA II-L310 |
| F4      | CTCTAAGCTGAATGAACGCCCCGAAA     | combinatorial mutant<br>D60W/L211R/L310R      |
| R4      | TAAACAATGCCGACTTTCGGGCGTTC     | combinatorial mutant<br>D60W/L211R/L310R      |
| F5      | 'CTGCTGCAACTGGCTCGCAC          | combinatorial mutant<br>D60W/L211R/L310R      |
| R5      | TGCGGATCTTTGGTTTGCGTGCGAGCC    | combinatorial mutant<br>D60W/L211R/L310R      |
